# Supplementary material for: Risk factors for SARS-Cov-2 infection at a United Kingdom electricity-generating company: a test-negative design case-control study
Source: bioRxiv or medRxiv preprint supplement (doi:10.1101/2023.08.25.23294609), 2024-01-22
Supplement: Supplementary file [file media-1.pdf]

## Supplementary Tables

**Table S1: Fully adjusted odds ratios and 95% confidence intervals from separate logistic regression models for each test reason**

| Exposure                    | Category                     | Final model <sup>a</sup><br>(n=70,686) | Symptoms <sup>b</sup><br>(n=2,772 <sup>c</sup> ) | Close contacts <sup>b</sup><br>(n=3175) | Other contacts <sup>b</sup><br>(n=2,599 <sup>d</sup> ) | Routine screening <sup>b</sup><br>(n=61,764 <sup>e</sup> ) |
|-----------------------------|------------------------------|----------------------------------------|--------------------------------------------------|-----------------------------------------|--------------------------------------------------------|------------------------------------------------------------|
| <b>Job category</b>         | Energy operations            | 0.91 (0.70, 1.20)                      | 0.94 (0.59, 1.50)                                | 0.69 (0.42, 1.13)                       | 0.34 (0.14, 0.87)                                      | 1.87 (1.06, 3.31)                                          |
|                             | Engineering                  | 0.90 (0.70, 1.17)                      | 1.08 (0.69, 1.70)                                | 0.79 (0.48, 1.28)                       | 0.27 (0.10, 0.73)                                      | 1.12 (0.65, 1.93)                                          |
|                             | External                     | 1.05 (0.82, 1.36)                      | 1.20 (0.77, 1.88)                                | 1.55 (0.96, 2.51)                       | 0.36 (0.14, 0.93)                                      | 0.93 (0.55, 1.59)                                          |
|                             | HSE & security               | 1.12 (0.78, 1.62)                      | 0.77 (0.40, 1.49)                                | 1.07 (0.56, 2.05)                       | 0.79 (0.28, 2.20)                                      | 1.54 (0.73, 3.24)                                          |
|                             | Nuclear & scientific         | 0.96 (0.68, 1.35)                      | 0.76 (0.43, 1.34)                                | 1.09 (0.56, 2.12)                       | 0.10 (0.01, 0.83)                                      | 1.78 (0.92, 3.45)                                          |
|                             | Office-based                 | 1.00 (baseline)                        | 1.00 (baseline)                                  | 1.00 (baseline)                         | 1.00 (baseline)                                        | 1.00 (baseline)                                            |
|                             | Project management           | 1.00 (0.66, 1.51)                      | 0.67 (0.33, 1.35)                                | 1.16 (0.51, 2.64)                       | 0.62 (0.17, 2.26)                                      | 1.75 (0.80, 3.83)                                          |
| <b>Sex</b>                  | Female                       | 0.71 (0.58, 0.86)                      | 0.50 (0.35, 0.72)                                | 0.83 (0.57, 1.22)                       | 0.86 (0.40, 1.87)                                      | 0.96 (0.65, 1.41)                                          |
| <b>Job site</b>             | Head Office                  | 0.70 (0.48, 1.03)                      | 0.53 (0.23, 1.20)                                | 0.58 (0.25, 1.36)                       | 0.13 (0.00, 3.69)                                      | 0.60 (0.32, 1.14)                                          |
|                             | Power station 1              | 0.58 (0.43, 0.77)                      | 0.27 (0.13, 0.56)                                | 0.25 (0.15, 0.43)                       | 0.18 (0.03, 1.25)                                      | 2.05 (1.17, 3.59)                                          |
|                             | Power station 2              | 0.38 (0.29, 0.49)                      | 0.18 (0.10, 0.34)                                | 0.19 (0.11, 0.33)                       | 0.11 (0.02, 0.65)                                      | 1.15 (0.71, 1.86)                                          |
|                             | Power station 3              | 0.90 (0.67, 1.20)                      | 0.24 (0.12, 0.46)                                | 0.86 (0.50, 1.48)                       | 0.11 (0.02, 0.71)                                      | 1.48 (0.85, 2.58)                                          |
|                             | Power station 4              | 0.42 (0.32, 0.55)                      | 0.13 (0.07, 0.25)                                | 0.19 (0.11, 0.33)                       | 0.13 (0.02, 0.78)                                      | 1.39 (0.86, 2.24)                                          |
|                             | Power station 5              | 0.97 (0.70, 1.33)                      | 0.41 (0.19, 0.89)                                | 0.51 (0.27, 0.97)                       | 0.10 (0.01, 0.78)                                      | 2.93 (1.72, 4.98)                                          |
|                             | Power station 6              | 0.22 (0.16, 0.29)                      | 0.12 (0.06, 0.24)                                | 0.20 (0.12, 0.34)                       | 0.04 (0.01, 0.28)                                      | 0.21 (0.12, 0.38)                                          |
|                             | Power station 7              | 1.00 (baseline)                        | 1.00 (baseline)                                  | 1.00 (baseline)                         | 1.00 (baseline)                                        | 1.00 (baseline)                                            |
|                             | Power station 8              | 2.05 (1.52, 2.77)                      | 1.17 (0.50, 2.75)                                | 3.90 (1.96, 7.74)                       | 0.84 (0.03, 27.46)                                     | 2.09 (1.24, 3.53)                                          |
|                             | Other                        | 0.31 (0.21, 0.44)                      | 0.13 (0.06, 0.28)                                | 0.18 (0.10, 0.34)                       | 0.00 (0.00, 0.05)                                      | 0.94 (0.44, 2.01)                                          |
| <b>Vaccination status</b>   | Per vaccination <sup>f</sup> | 0.97 (0.88, 1.06)                      | 0.89 (0.76, 1.06)                                | 0.86 (0.72, 1.02)                       | 0.80 (0.52, 1.22)                                      | 0.89 (0.75, 1.05)                                          |
| <b>Vulnerability status</b> | Vulnerable                   | 0.78 (0.63, 0.96)                      | 0.87 (0.56, 1.35)                                | 1.43 (0.99, 2.05)                       | 0.57 (0.24, 1.34)                                      | 0.87 (0.56, 1.35)                                          |
| <b>Outage</b>               | During outage                | 1.35 (1.12, 1.63)                      | 0.54 (0.39, 0.74)                                | 5.15 (3.44, 7.71)                       | 4.10 (1.41, 11.94)                                     | 0.54 (0.39, 0.74)                                          |
| <b>Site risk rating</b>     | 0/1 (lowest risk)            | 1.00 (baseline)                        | 1.00 (baseline)                                  | 1.00 (baseline)                         | 1.00 (baseline)                                        | 1.00 (baseline)                                            |
|                             | 2                            | 0.64 (0.50, 0.82)                      | 0.37 (0.23, 0.62)                                | 1.15 (0.76, 1.74)                       | 1.36 (0.40, 4.65)                                      | 0.37 (0.23, 0.62)                                          |
|                             | 3                            | 1.30 (1.00, 1.69)                      | 1.05 (0.62, 1.78)                                | 2.10 (1.36, 3.23)                       | 4.05 (1.26, 13.02)                                     | 1.05 (0.62, 1.78)                                          |
|                             | 4                            | 1.60 (1.11, 2.31)                      | 0.51 (0.24, 1.10)                                | 2.74 (1.44, 5.22)                       | 5.18 (1.11, 24.15)                                     | 0.51 (0.24, 1.08)                                          |

<sup>a</sup> adjusted for all variables in the table plus test date, test type, age and test reason; <sup>b</sup> adjusted for all variables in the table plus test date, test type, and age;

<sup>c</sup> one observation omitted; <sup>d</sup> 64 observations omitted; <sup>e</sup> 269 observations omitted; <sup>f</sup> up to fully vaccinated (2 or more vaccinations);
